# Supplementary material
Source: PubMed Central journal article supplement (PMC5074638)

**Supplementary Data 1.** ICP data for SbCCoAOMT calcium content. Average  $\text{Ca}^{2+}$  content as fractional occupancy of SbCCoAOMT was 89.6%. The emission intensity and concentration values belonging on calcium standards are indicated as black squares, whereas that belonging to SbCCoAOMT is indicated as a red triangle.

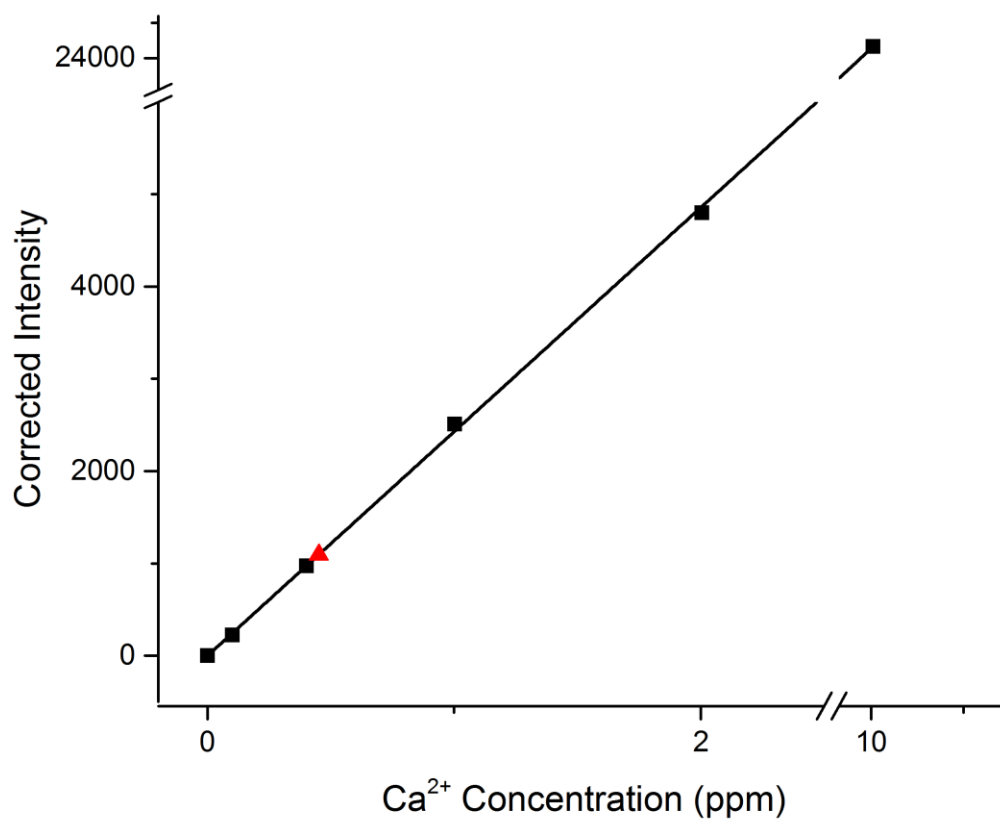

**Supplementary Data 2.** Chromatograms of 5-hydroxyferuloyl-CoA assays and 100  $\mu\text{M}$  sinapoyl-CoA standard. A substrate concentration of 10  $\mu\text{M}$  5-hydroxyferuloyl-CoA was used in each assay. The time indicated on the right-hand side of the chromatogram indicates the reaction time until termination. The small baseline rise present in all injections is due to the acetonitrile gradient.

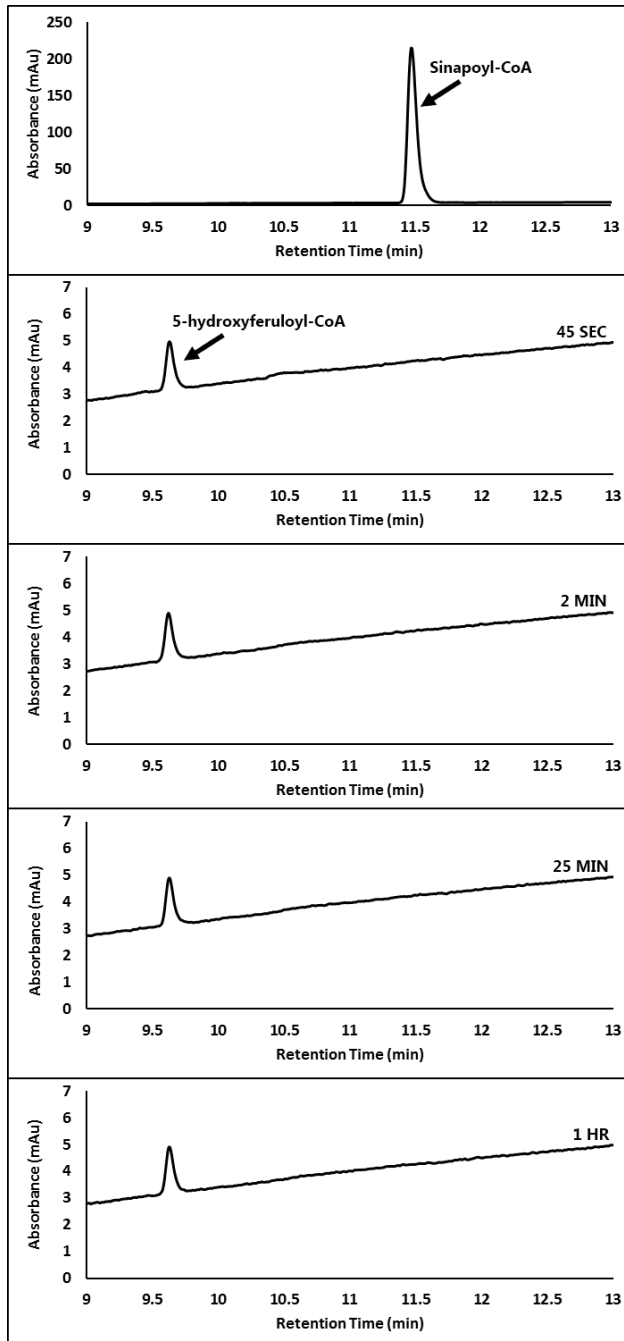

**Supplementary Data 3.** SDS-PAGE of wild-type SbCCoAOMT and mutants. **A.** Wild-type SbCCoAOMT following purification. **B.** Purified K180A and D252A SbCCoAOMT mutants are shown in lanes 1 and 2, respectively.

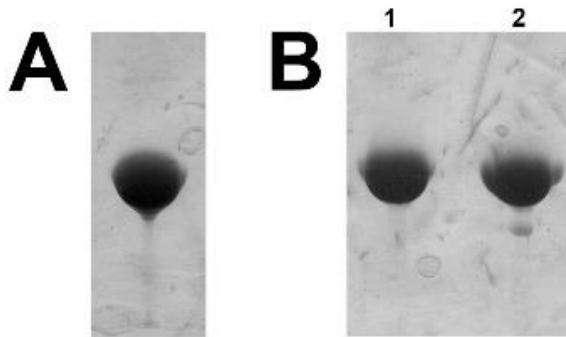

Supplement: supp_pp.16.00845_PP2016-00845R1_Supplemental_Material.pdf [file supp_pp.16.00845_PP2016-00845R1_Supplemental_Material.pdf]
